# Supplementary material
Source: Research Square preprint supplement (doi:10.21203/rs.3.rs-9402003/v1)
Supplement: Supplementary file 1 [file a4fa0a999d08e7be20fbbbac.docx]

SUPPLEMENTARY INFORMATION

**Supplementary Table 1. Outcome of a full linear mixed-effects model testing the association between the maternal aggression (MA) phenotype of the mother and detour latency in a detour task.** The model includes main effects of MA, multi-baseline measure, trial, barrier order and barrier type, as well as interactions between MA and trial and between MA and multi-baseline measure. Detour latency was winsorised (trim = 0.05) to limit the influence of extreme values. † indicates marginal significance (0.05 < P < 0.10); bold values indicate P < 0.05.

|  | **Detour Latency** | | | |
| --- | --- | --- | --- | --- |
|  | **Estimate (SE)** | **F** | **df** | **P** |
| *Intercept* | 1.77 (±0.20) | - | - | **<0.001** |
| *MA* | 0.39 (±0.29) | 1.79 | (1, 88.05) | 0.18 |
| *Multi-baseline measure* | 0.01 (±0.01) | 0.04 | (1, 44.42) | 0.83 |
| *Trial* | -0.15 (±0.03) | 82.72 | (1, 203.51) | **<0.001** |
| *MA: Trial* | -0.08 (±0.04) | 3.83 | (1, 203.51) | *†*0.05 |
| *MA: Multi-baseline measure* | -0.01 (±0.01) | 1.99 | (1, 44.42) | 0.16 |

**Supplementary Table 2. Outcome of a reduced linear mixed-effects model testing the association between the maternal aggression (MA) phenotype of the mother and detour latency, with trial (1–3) and test session (1–2) included as separate fixed effects.** Detour latency was winsorised (trim = 0.05). This model is presented to document the effect of modelling test session and trial separately; simplified models collapsing across test sessions are presented in the main text. † indicates marginal significance (0.05 < P < 0.10); bold values indicate P < 0.05.

|  | **Detour Latency** | | | |
| --- | --- | --- | --- | --- |
|  | **Estimate (SE)** | **F** | **df** | **P** |
| *Intercept* | 1.35 (±0.13) | - | - | **<0.001** |
| *MA* | -0.15 (±0.17) | 0.76 | (1, 41.89) | 0.38 |
| *Multi-baseline measure* | -0.01 (±0.01) | 0.15 | (1, 45.61) | 0.69 |
| *Test* | -0.29 (±0.07) | 59.56 | (1, 204.39) | **<0.001** |
| *Trial* | - | 14.72 | (2, 189.97) | **<0.001** |
| *Trial 2* | -0.31 (±0.06) | - | - | **-** |
| *Trial 3* | 0.13 (±0.06) | - | - | - |
| *MA: Test* | -0.25 (±0.10) | 5.37 | (1, 206.93) | **0.02** |

**Supplementary Table 3. Outcome of a full linear mixed-effects model testing the association between the maternal aggression (MA) phenotype of the mother and detour latency, including all main effects and interactions among MA, trial (1–3), and test session (1–2).** Detour latency was winsorised (trim = 0.05). This table documents the full factorial model prior to model simplification. † indicates marginal significance (0.05 < P < 0.10); bold values indicate P < 0.05.

|  | **Detour Latency** | | | |
| --- | --- | --- | --- | --- |
|  | **Estimate (SE)** | **F** | **df** | **P** |
| *Intercept* | 1.21 (±0.16) | - | - | **<0.001** |
| *MA* | 0.09 (±0.24) | 0.17 | (1, 42.39) | 0.68 |
| *Multi-baseline measure* | 0.01 (±0.01) | 0.06 | (1, 44.44) | 0.79 |
| *Test* | -0.28 (±0.07) | 58.03 | (1, 198.21) | **<0.001** |
| *Trial* | - | 14.58 | (2, 184.15) | **<0.001** |
| *Trial 2* | -0.32 (±0.09) | - | - | - |
| *Trial 3* | 0.15 (±0.08) | - | - | - |
| *MA: Multi-baseline measure* | -0.01 (±0.01) | 2.23 | (1, 44.44) | 0.14 |
| *MA: Test* | -0.26 (±0.10) | 5.86 | (1, 198.21) | **0.01** |
| *MA: Trial* | - | 0.04 | (2, 184.15) | 0.95 |
| *MA: Trial 2* | 0.01 (±0.12) | - | - | - |
| *MA: Trial 3* | -0.03 (±0.12) | - | - | - |
| *Test: Trial* | - | 1.29 | (2, 184.17) | 0.27 |
| *Test: Trial 2* | 0.11 (±0.12) | - | - | - |
| *Test: Trial 3* | 0.04 (±0.12) | - | - | - |
| *MA: Test: Trial* | - | 0.28 | (2, 184.17) | 0.75 |
| *MA: Test: Trial 2* | 0.06 (±0.17) | - | - | - |
| *MA: Test: Trial 3* | -0.11 (±0.17) | - | - | - |

**Supplementary Table 4. Outcome of a full beta mixed-effects model (logit link) testing the association between the maternal aggression (MA) phenotype of the mother and the proportion of time persisting at the barrier in a detour task.** The response variable was adjusted following Smithson & Verkuilen (2006) to accommodate values of 0 and 1. The model includes main effects of MA, multi-baseline measure latency, trial, barrier order, barrier type, and their interactions with MA. † indicates marginal significance (0.05 < P < 0.10); bold values indicate P < 0.05.

|  | **Proportion of time persisting** | | |
| --- | --- | --- | --- |
|  | **Estimate (SE)** | **Z value** | **P** |
| *Intercept* | 0.44 (±0.27) | 1.62 | 0.10 |
| *MA* | -0.38 (±0.35) | -1.08 | 0.28 |
| *Multi-baseline measure* | -0.01 (±0.01) | -0.01 | 0.99 |
| *Trial* | -0.08 (±0.05) | -1.54 | 0.12 |
| *MA: Multi-baseline measure* | 0.01 (±0.01) | 0.25 | 0.79 |
| *MA: Trial* | 0.05 (±0.07) | 0.80 | 0.42 |

**Supplementary Table 5. Outcome of a full beta mixed-effects model (logit link) testing the association between the maternal aggression (MA) phenotype of the mother and the proportion of time persisting, with trial (1–3) and test session (1–2) included as separate fixed effects**. The response variable was adjusted following Smithson & Verkuilen (2006). This table documents the full model prior to collapsing across test sessions in the main analyses. † indicates marginal significance (0.05 < P < 0.10); bold values indicate P < 0.05.

|  | **Proportion of time persisting** | | |
| --- | --- | --- | --- |
|  | **Estimate (SE)** | **Z value** | **P** |
| *Intercept* | 0.13 (±0.16) | 0.86 | 0.38 |
| *MA* | -0.22 (±0.23) | -0.96 | 0.33 |
| *Multi-baseline measure* | -0.01 (±0.01) | -0.03 | 0.97 |
| *Test* | -0.13 (±0.12) | -1.08 | 0.28 |
| *Trial 2* | -0.22 (±0.14) | -1.51 | 0.13 |
| *Trial 3* | -0.02 (±0.14) | -0.14 | 0.88 |
| *MA: Multi-baseline measure* | 0.01 (±0.01) | 0.38 | 0.70 |
| *MA: Test* | 0.26 (±0.17) | 1.54 | 0.12 |
| *MA: Trial 2* | -0.18 (±0.20) | -0.91 | 0.35 |
| *MA: Trial 3* | -0.01 (±0.20) | -0.09 | 0.92 |
| *Test: Trial 2* | 0.50 (±0.21) | 2.39 | **0.01** |
| *Test: Trial 3* | -0.12 (±0.20) | -0.62 | 0.53 |
| *MA: Test: Trial 2* | -0.81 (±0.29) | -2.78 | **<0.001** |
| *MA: Test: Trial 3* | 0.27 (±0.28) | 0.94 | 0.34 |

**Supplementary Table 6. Outcome of a full linear mixed-effects model testing the association between offspring exposure to maternal aggression (biological mother phenotype and foster mother phenotype) and detour latency.** The model includes all main effects and interactions with trial and multi-baseline measure. Detour latency was winsorised (trim = 0.05). † indicates marginal significance (0.05 < P < 0.10); bold values indicate P < 0.05.

|  | **Detour latency** | | | |
| --- | --- | --- | --- | --- |
|  | **Estimate (SE)** | **F** | **df** | **P** |
| *Intercept* | 2.85 (*±*0.18) | - | - | **<0.001** |
| *Multi-baseline measure* | 0.01 (*±*0.01) | 0.21 | (1, 86.31) | 0.64 |
| *Barrier order* | 0.01 (*±*0.20) | 0.01 | (1, 12.78) | 0.93 |
| *Barrier type* | 0.09 (*±*0.05) | 2.73 | (1, 563.15) | *†*0.09 |
| *Biological mother phenotype (BMP)* | 0.02 (*±*0.28) | 0.58 | (1, 139.26) | 0.44 |
| *Foster mother phenotype (FMP)* | 0.28 (*±*0.33) | 0.01 | (1, 159.83) | 0.89 |
| *Trial* | -0.27 (*±*0.02) | 191.53 | (1, 569. 46) | **<0.001** |
| *BMP: FMP* | -0.49 (*±*0.58) | 0.71 | (1, 165.78) | 0.39 |
| *FMP: Trial* | -0.01 (*±*0.05) | 0.06 | (1, 568.68) | 0.79 |
| *BMP: Trial* | 0.01 (*±*0.04) | 0.01 | (1, 568.58) | 0.89 |
| *FMP: Multi-baseline measure* | 0.01 (*±*0.02) | 0.01 | (1, 88.70) | 0.91 |
| *BMP: Multi-baseline measure* | 0.01 (*±*0.01) | 0.03 | (1, 84.98) | 0.85 |
| *BMP: FMP: Trial* | 0.01 (*±*0.08) | 0.01 | (1, 569.87) | 0.89 |
| *BMP: FMP: Multi-baseline measure* | 0.01 (*±*0.04) | 0.01 | (1, 87.07) | 0.97 |

**Supplementary Table 7. Outcome of a reduced linear mixed-effects model testing the association between offspring exposure to maternal aggression and detour latency, with trial (1–3) and test session (1–2) included as separate fixed effects.** Detour latency was winsorised (trim = 0.05). This model is provided to document analyses conducted prior to collapsing across test sessions in the main text. † indicates marginal significance (0.05 < P < 0.10); bold values indicate P < 0.05.

|  | **Detour latency** | | | |
| --- | --- | --- | --- | --- |
|  | **Estimate (SE)** | **F** | **df** | **P** |
| *Intercept* | 2.77 (±0.12) | - | - | **<0.001** |
| *Multi-baseline measure* | 0.01 (±0.01) | 4.01 | (1, 104.95) | **0.04** |
| *Biological mother phenotype* | -0.22 (±0.14) | 2.25 | (1, 77.69) | 0.13 |
| *Foster mother phenotype* | 0.08 (±0.15) | 0.28 | (1, 103.76) | 0.59 |
| *Trial* | - | 59.07 | (2, 563.16) | **<0.001** |
| *Trial 2* | -0.50 (±0.06) | - | - | - |
| *Trial 3* | -0.68 (±0.06) | - | - | - |
| *Test* | -0.77 (±0.05) | 209.04 | (1, 563.56) | **<0.001** |

**Supplementary Table 8. Outcome of a full linear mixed-effects model testing the association between offspring exposure to maternal aggression and detour latency,** including all interactions among biological mother phenotype, foster mother phenotype, trial, and test session. Detour latency was winsorised (trim = 0.05). † indicates marginal significance (0.05 < P < 0.10); bold values indicate P < 0.05.

|  | **Detour latency** | | | |
| --- | --- | --- | --- | --- |
|  | **Estimate (SE)** | **F** | **df** | **P** |
| *Intercept* | 2.72 (±0.13) | - | - | **<0.001** |
| *Multi-baseline measure* | 0.01 (±0.01) | 0.18 | (1, 88.13) | 0.66 |
| *Biological mother phenotype (BMP)* | 0.05 (±0.26) | 0.64 | (1, 84.79) | 0.42 |
| *Foster mother phenotype (FMP)* | 0.29 (±0.31) | 0.01 | (1, 97.65) | 0.99 |
| *Trial* | - | 34.68 | (2, 557.45) | **<0.001** |
| *Trial 2* | -0.52 (±0.08) | - | - | - |
| *Trial 3* | -0.70 (±0.08) | - | - | - |
| *Test* | -0.75 (±0.06) | 136.29 | (1, 558.98) | **<0.001** |
| *BMP: FMP* | -0.64 (±0.56) | 0.82 | (1, 97.84) | 0.36 |
| *FMP: Trial* | - | 0.35 | (2, 557.45) | 0.70 |
| *FMP: Trial 2* | -0.05 (±0.22) | - | - | - |
| *FMP: Trial 3* | -0.02 (±0.22) | - | - | - |
| *BMP: Trial* | - | 0.29 | (2, 557.45) | 0.74 |
| *BMP: Trial 2* | -0.01 (±0.19) | - | - | - |
| *BMP: Trial 3* | -0.08 (±0.19) | - | - | - |
| *FMP: Test* | -0.08 (±0.18) | 0.50 | (1, 558.98) | 0.47 |
| *BMP: Test* | 0.01 (±0.15) | 0.02 | (1, 558.98) | 0.88 |
| *FMP: Multi-baseline measure* | 0.01 (±0.01) | 0.01 | (1, 89.75) | 0.91 |
| *BMP: Multi-baseline measure* | -0.01 (±0.01) | 0.03 | (1, 85.69) | 0.85 |
| *BMP: FMP: Trial* | - | 0.55 | (1, 557.45) | 0.57 |
| *BMP: FMP: Trial 2* | 0.28 (±0.33) | - | - | - |
| *BMP: FMP: Trial 3* | 0.32 (±0.33) | - | - | - |
| *BMP: FMP: Test* | -0.03 (±0.27) | 0.01 | (1, 558.98) | 0.90 |
| *BMP: FMP: Multi-baseline measure* | -0.01 (±0.04) | 0.01 | (1, 87.59) | 0.97 |

**Supplementary Table 9. Outcome of a full linear mixed-effects model testing the association between offspring exposure to maternal aggression and total time persisting at the barrier in a detour task**. The model includes main effects and interactions with trial and multi-baseline measure. Total time persisting was winsorised (trim = 0.05). † indicates marginal significance (0.05 < P < 0.10); bold values indicate P < 0.05.

|  | **Total time persisting** | | | |
| --- | --- | --- | --- | --- |
|  | **Estimate (SE)** | **F** | **df** | **P** |
| *Intercept* | 7.65 (*±*1.17) | - | - | **<0.001** |
| *Multi-baseline measure* | 0.02 (0.01) | 0.82 | (1, 96.78) | 0.36 |
| *Barrier order* | 1.25 (1.04) | 1.43 | (1, 14.33) | 0.24 |
| *Barrier type* | 1.02 (0.59) | 2.93 | (1, 567.14) | 0.08 |
| *Biological mother phenotype (BMP)* | -0.01 (2.30) | 0.01 | (1, 297.36) | 0.95 |
| *Foster mother phenotype (FMP)* | -1.53 (2.68) | 0.39 | (1, 318.73) | 0.52 |
| *Trial* | -1.69 (0.21) | 52.48 | (1, 573.55) | **<0.001** |
| *BMP: FMP* | 0.26 (4.45) | 0.01 | (1, 330.44) | 0.95 |
| *FMP: Trial* | 0.30 (0.57) | 0.01 | (1, 572.74) | 0.52 |
| *BMP: Trial* | 0.15 (0.51) | 0.06 | (1, 572.64) | 0.80 |
| *FMP: Multi-baseline measure* | 0.04 (0.12) | 0.47 | (1, 98.91) | 0.49 |
| *BMP: Multi-baseline measure* | -0.01 (0.02) | 0.08 | (1, 93.78) | 0.77 |
| *BMP: FMP: Trial* | -0.52 (0.88) | 0.35 | (1, 573.97) | 0.55 |
| *BMP: FMP: Multi-baseline measure* | 0.11 (0.29) | 0.13 | (1, 95.60) | 0.70 |

**Supplementary Table 10. Outcome of a reduced linear mixed-effects model testing the association between offspring exposure to maternal aggression and total time persisting, with trial (1–3) and test session (1–2) included as separate fixed effects.** Total time persisting was winsorised (trim = 0.05). † indicates marginal significance (0.05 < P < 0.10); bold values indicate P < 0.05.

|  | **Total time persisting** | | | |
| --- | --- | --- | --- | --- |
|  | **Estimate (SE)** | **F** | **df** | **P** |
| *Intercept* | 7.93 (*±0.79*) | - | - | **<0.001** |
| *Multi-baseline measure* | 0.01 (*±*0.01) | 1.19 | (1, 94.74) | 0.27 |
| *Biological mother phenotype* | 0.11 (*±*0.93) | 0.01 | (1, 89.24) | 0.90 |
| *Foster mother phenotype* | -0.33 (*±*0.98) | 0.11 | (1, 107.99) | 0.73 |
| *Trial* | - | 21.84 | (2, 567.61) | **<0.001** |
| *Trial 2* | -3.60 (*±*0.71) | - | - | - |
| *Trial 3* | -4.46 (*±*0.71) | - | - | - |
| *Test* | -4.42 (*±*0.58) | 57.04 | (1, 568.33) | **<0.001** |

**Supplementary Table 11. Outcome of a full linear mixed-effects model testing the association between offspring exposure to maternal aggression and total time persisting**, including all interactions among biological mother phenotype, foster mother phenotype, trial, test session and multi-baseline measure. Total time persisting was winsorised (trim = 0.05). † indicates marginal significance (0.05 < P < 0.10); bold values indicate P < 0.05.

|  | **Total time persisting** | | | |
| --- | --- | --- | --- | --- |
|  | **Estimate (SE)** | **F** | **df** | **P** |
| *Intercept* | 7.86 (±0.92) | - | - | **<0.001** |
| *Multi-baseline measure* | 0.02 (±0.01) | 0.61 | (1, 98.51) | 0.43 |
| *Biological mother phenotype (BMP)* | 1.51 (±2.06) | 0.01 | (1, 97.32) | 0.94 |
| *Foster mother phenotype (FMP)* | -1.47 (±2.45) | 0.59 | (1, 107.06) | 0.44 |
| *Trial* | - | 12.34 | (2, 561.02) | **<0.001** |
| *Trial 2* | -3.63 (±0.91) | - | - | - |
| *Trial 3* | -4.57 (±0.91) | - | - | - |
| *Test* | -4.44 (±0.74) | 34.29 | (1, 563.56) | **<0.001** |
| *BMP: FMP* | -1.65 (±4.12) | 0.33 | (1, 106.16) | 0.56 |
| *FMP: Trial* | - | 0.85 | (2, 561.02) | 0.42 |
| *FMP: Trial 2* | 1.69 (±2.40) | - | - | - |
| *FMP: Trial 3* | 1.23 (±2.40) | - | - | - |
| *BMP: Trial* | - | 0.26 | (2, 561.02) | 0.76 |
| *BMP: Trial 2* | -2.04 (±2.13) | - | - | - |
| *BMP: Trial 3* | -0.53 (±2.13) | - | - | - |
| *FMP: Test* | 0.35 (±1.96) | 0.02 | (1, 563.56) | 0.87 |
| *BMP: Test* | 0.35 (±1.73) | 0.02 | (1, 563.56) | 0.87 |
| *FMP: Multi-baseline measure* | 0.04 (±0.12) | 0.37 | (1, 99.73) | 0.54 |
| *BMP: Multi-baseline measure* | -0.01 (±0.02) | 0.05 | (1, 93.98) | 0.81 |
| *BMP: FMP: Trial* | - | 0.12 | (2, 561.02) | 0.88 |
| *BMP: FMP: Trial 2* | 1.40 (±3.66) | - | - | - |
| *BMP: FMP: Trial 3* | -0.29 (±3.66) | - | - | - |
| *BMP: FMP: Test* | -1.17 (±2.99) | 0.15 | (1, 563.56) | 0.69 |
| *BMP: FMP: Multi-baseline measure* | 0.10 (±0.29) | 0.11 | (1, 95.59) | 0.73 |

**Supplementary Table 12. Outcome of a reduced linear mixed-effects model testing the association between age class (adult females vs. juveniles) and detour latency, with trial (1–3) and test session (1–2) included as separate fixed effects**. † indicates marginal significance (0.05 < P < 0.10); bold values indicate P < 0.05.

|  | **Detour latency** | | | |
| --- | --- | --- | --- | --- |
|  | **Estimate (SE)** | **F** | **df** | **P** |
| *Intercept* | 2.18 (*±*0.08) | - | - | **<0.001** |
| *Age class* | 0.65 (*±*0.09) | 47.46 | (1, 165.43) | **<0.001** |
| *Trial* | - | 80.70 | (2, 919.37) | **<0.001** |
| *Trial 2* | -0.58 (*±*0.06) | - | - | - |
| *Trial 3* | -0.83 (*±*0.06) | - | - | **-** |
| *Test* | -0.93 (*±*0.06) | 187.71 | (1, 930.32) | **<0.001** |
| *Test: Trial* | - | 10.47 | (2, 920.42) | **<0.001** |
| *Test: Trial 2* | 0.21 (*±*0.09) | - | - | **-** |
| *Test: Trial 3* | 0.43 (*±*0.09) | - | - | **-** |

**Supplementary Table 13. Outcome of a full linear mixed-effects model testing the association between age class and detour latency, including interactions with trial (1–3) and test session (1–2) included as separate fixed effects**. † indicates marginal significance (0.05 < P < 0.10); bold values indicate P < 0.05.

|  | **Detour latency** | | | |
| --- | --- | --- | --- | --- |
|  | **Estimate (SE)** | **F** | **df** | **P** |
| *Intercept* | 2.06 (*±*0.09) | - | - | **<0.001** |
| *Age class* | 0.85 (*±*0.12) | 42.75 | (1, 550.00) | **<0.001** |
| *Trial* | - | 20.48 | (2, 915.11) | **<0.001** |
| *Trial 2* | -0.50 (*±*0.10) | - | - | - |
| *Trial 3* | -0.66 (*±*0.10) | - | - | **-** |
| *Test* | -0.78 (*±*0.11) | 49.83 | (1, 946.33) | **<0.001** |
| *Age class : Trial* | - | 2.04 | (2, 914. 65) | 0.12 |
| *Age class : Trial 2* | -0.13 (*±*0.13) | - | - | **-** |
| *Age class : Trial 3* | -0.28 (*±*0.13) | - | - | **-** |
| *Age class : Test* | -0.24 (*±*0.14) | 3.05 | (1, 934.16) | *†*0.08 |
| *Test: Trial* | - | 1.67 | (2, 915.00) | 0.18 |
| *Test: Trial 2* | 0.15 (*±*0.15) | - | - | **-** |
| *Test: Trial 3* | 0.27 (*±*0.15) | - | - | **-** |
| *Age class : Test: Trial* | - | 0.87 | (2, 915.29) | 0.41 |
| *Age class : Test: Trial 2* | 0.10 (*±*0.19) | - | - | **-** |
| *Age class: Test: Trial 3* | 0.25 (*±*0.19) | - | - | **-** |

**Supplementary Table 14. Outcome of a reduced linear mixed-effects model testing the association between age class and the proportion of time persisting at the barrier, with trial (1–3) and test session (1–2) included as separate fixed effects.** † indicates marginal significance (0.05 < P < 0.10); bold values indicate P < 0.05.

|  | **Proportion of time persisting** | | | |
| --- | --- | --- | --- | --- |
|  | **Estimate (SE)** | **F** | **df** | **P** |
| *Intercept* | 1.13 (*±*0.05) | - | - | **<0.001** |
| *Age class* | -0.46 (*±*0.07) | 30.94 | (1, 167.35) | **<0.001** |
| *Trial* | - | 2.72 | (2, 240.43) | **0.06** |
| *Trial 2* | -0.10 (*±*0.05) | - | - | - |
| *Trial 3* | -0.12 (*±*0.06) | - | - | **-** |
| *Test* | -0.10 (*±*0.05) | 1.49 | (1, 271.17) | 0.22 |
| *Age class : Test* | 0.34 (*±*0.16) | 4.48 | (1, 279.68) | **0.03** |

**Supplementary Table 15. Outcome of a full linear mixed-effects model testing the association between age class and the proportion of time persisting, including interactions with trial and test session.** † indicates marginal significance (0.05 < P < 0.10); bold values indicate P < 0.05.

|  | **Proportion of time persisting** | | | |
| --- | --- | --- | --- | --- |
|  | **Estimate (SE)** | **F** | **df** | **P** |
| *Intercept* | 1.16 (*±*0.06) | - | - | **<0.001** |
| *Age class* | -0.51 (*±*0.10) | 30.88 | (1, 165.31) | **<0.001** |
| *Trial* | - | 2.69 | (2, 234.53) | 0.06 |
| *Trial 2* | -0.13 (*±*0.09) | - | - | - |
| *Trial 3* | -0.20 (*±*0.09) | - | - | **-** |
| *Test* | -0.20 (*±*0.09) | 1.53 | (1, 264.39) | 0.21 |
| *Age class : Trial* | - | 0.78 | (2, 264.24) | 0.45 |
| *Age class : Trial 2* | 0.06 (*±*0.16) | - | - | **-** |
| *Age class : Trial 3* | 0.17 (*±*0.19) | - | - | **-** |
| *Age class : Test* | 0.33 (*±*0.22) | 3.86 | (1, 270.84) | 0.05 |
| *Test: Trial* | - | 0.40 | (2, 230.65) | 0.66 |
| *Test: Trial 2* | 0.04 (*±*0.13) | - | - | **-** |
| *Test: Trial 3* | 0.09 (*±*0.13) | - | - | **-** |
| *Age class : Test: Trial* | - | 0.35 | (2, 273.49) | 0.70 |
| *Age class : Test: Trial 2* | -0.33 (*±*0.50) | - | - | **-** |
| *Age class: Test: Trial 3* | 0.11 (*±*0.37) | - | - | **-** |
